# Supplementary material for: Development of a computational fluid dynamic model to investigate the hemodynamic impact of REBOA
Source: Frontiers journal article supplement (doi:10.3389/fphys.2022.1005073), 2022-10-13
Supplement: Image_1.PDF [file Image_1.PDF]

## *Supplementary Material*

**Supplemental Video 1. CFD animations of blood pressure and velocity over a cardiac cycle during baseline.** (A) Pressure distribution at baseline, (B) Velocity streamlines at baseline. Videos have been slowed down to 1/5<sup>th</sup> of actual speed for easier viewing.

**Supplemental Video 2. CFD animations of blood pressure and velocity over a cardiac cycle at the end of 20% hemorrhage.** (A) Pressure distribution during hemorrhage, (B) Velocity streamlines during hemorrhage. Videos have been slowed down to 1/5<sup>th</sup> of actual speed for easier viewing.

**Supplemental Video 3. CFD animations of blood pressure and velocity over a cardiac cycle during full REBOA.** (A) Pressure distribution during f-REBOA, (B) Velocity streamlines during f-REBOA. Videos have been slowed down to 1/5<sup>th</sup> of actual speed for easier viewing.

**Supplemental Video 4. CFD animations of blood pressure and velocity over a cardiac cycle during partial REBOA.** (A) Pressure distribution during p-REBOA, (B) Velocity streamlines during p-REBOA. Videos have been slowed down to 1/5<sup>th</sup> of actual speed for easier viewing.
